# Supplementary material for: Enhanced somatic embryogenesis in Theobroma cacao using the homologous BABY BOOM transcription factor
Source: PubMed Central journal article supplement (PMC4449528; doi:10.1186/s12870-015-0479-4), 2015-05-16
Supplement: 12870_2015_479_MOESM4_ESM.pdf [file 12870_2015_479_MOESM4_ESM.pdf]

**A****B****C**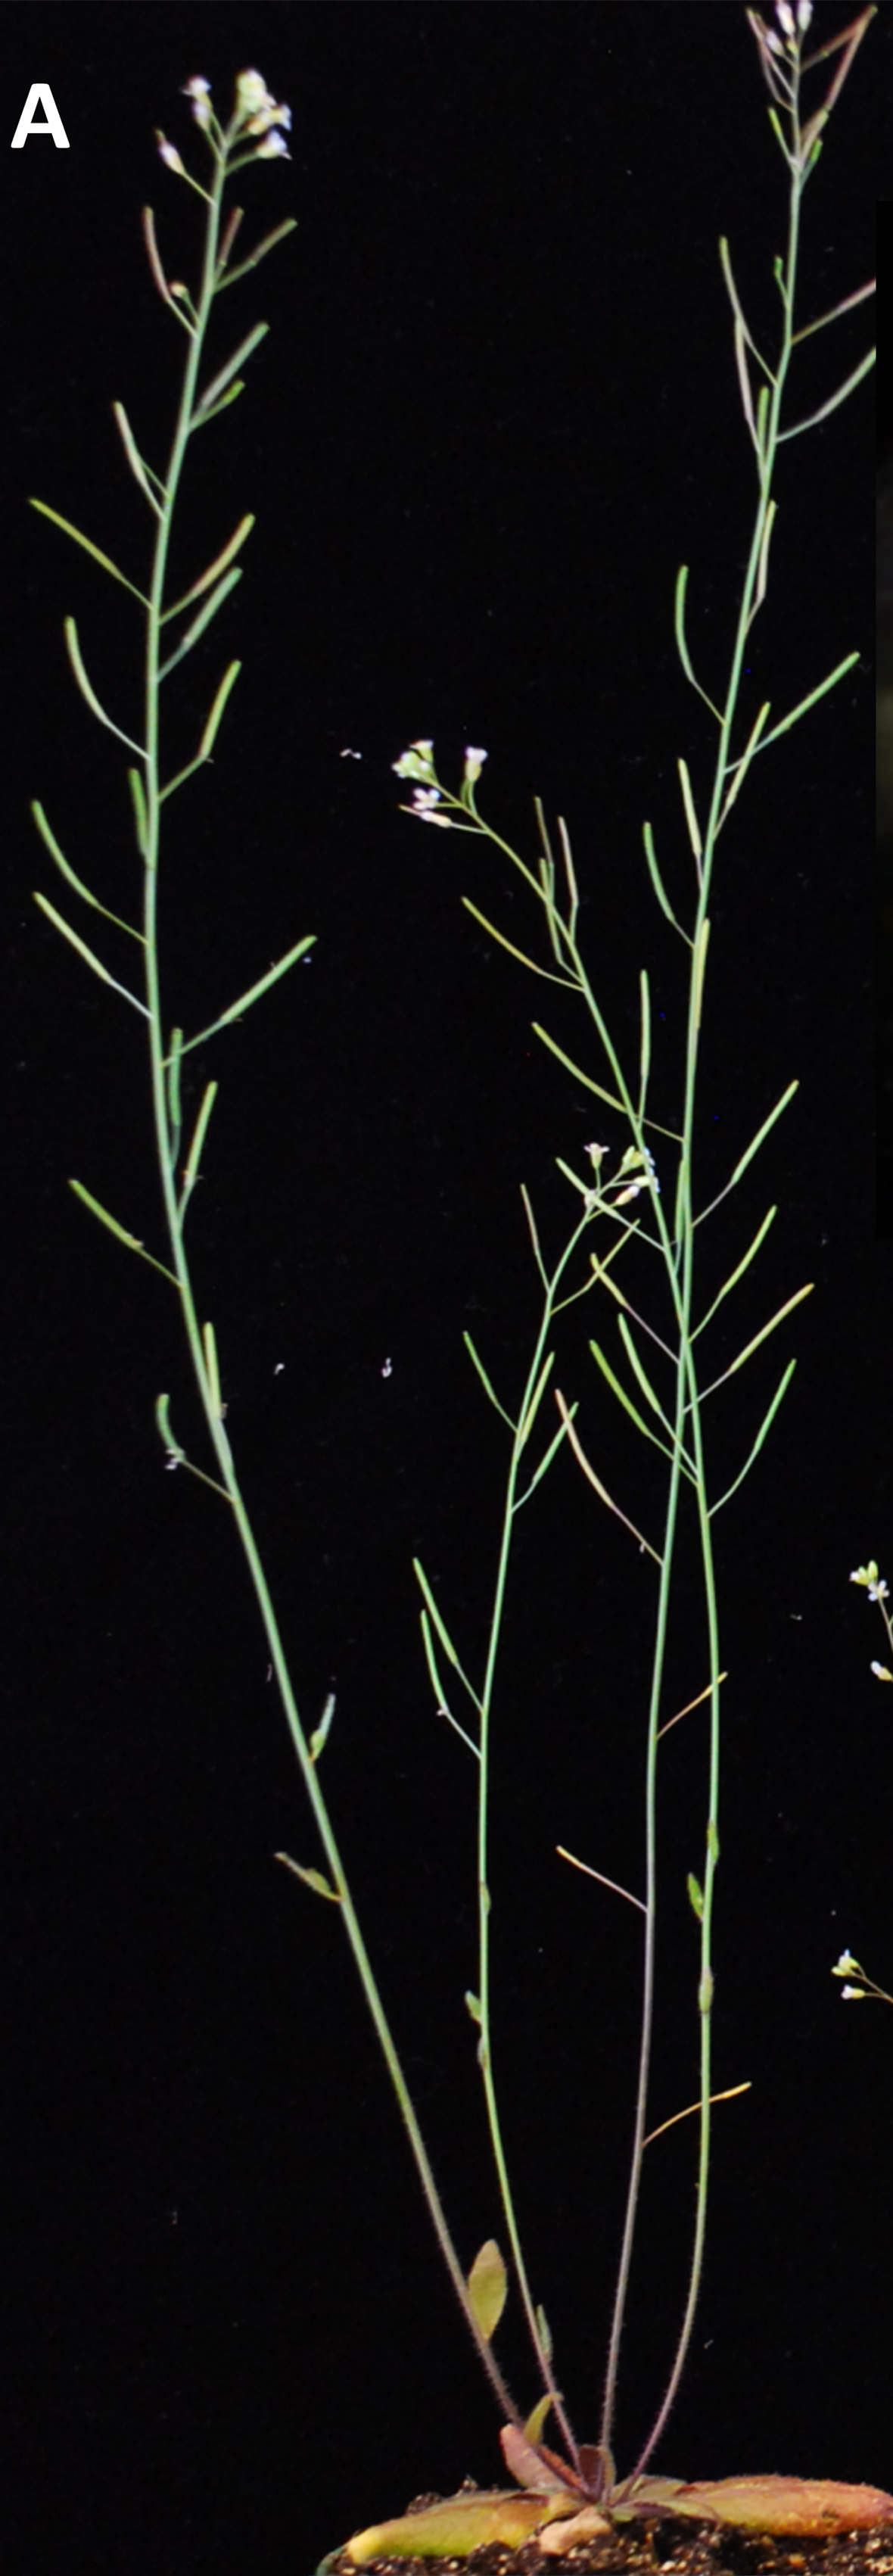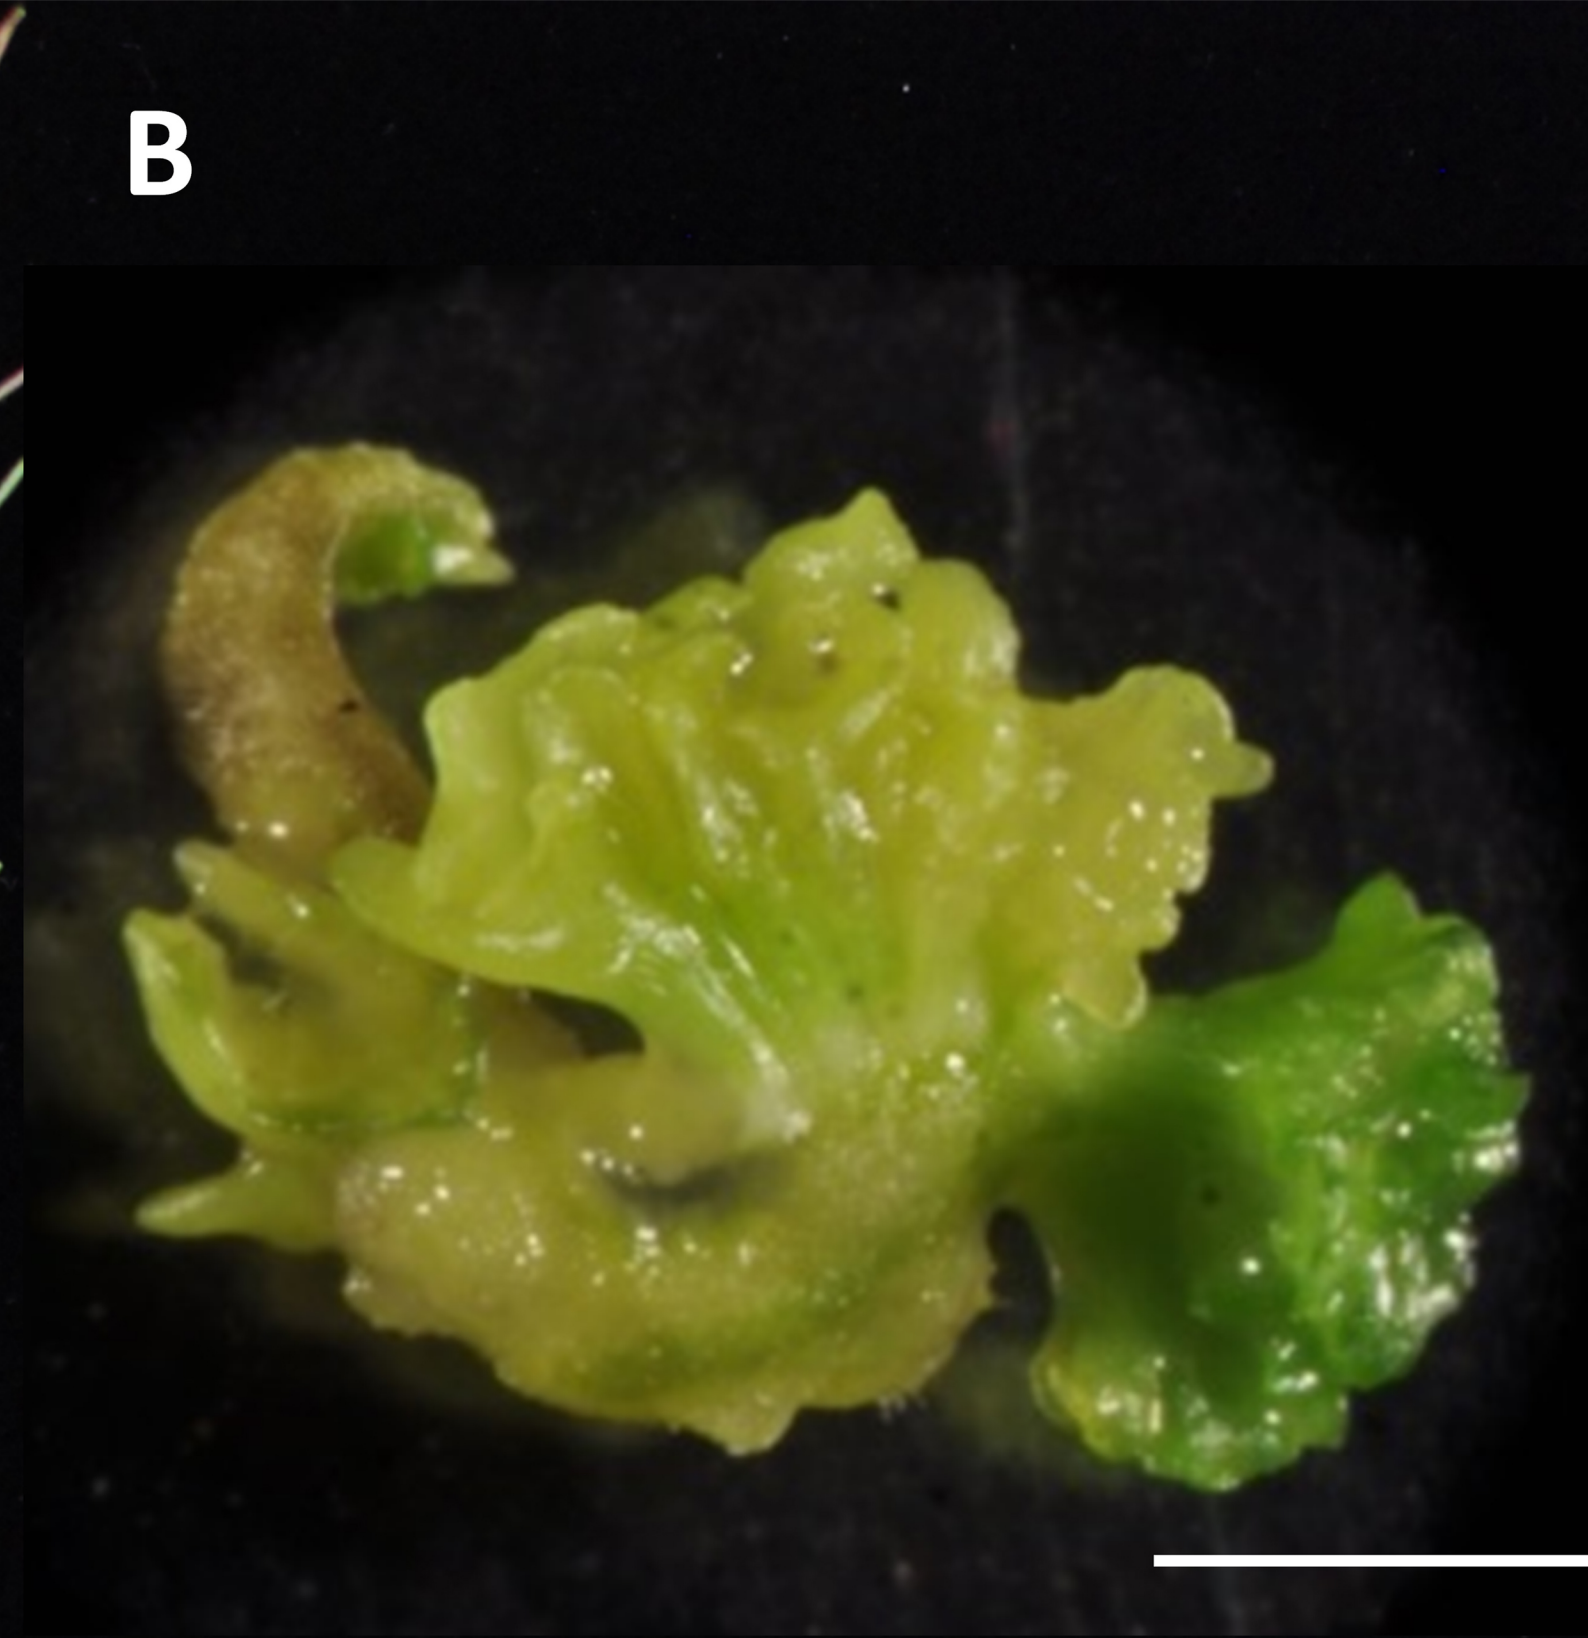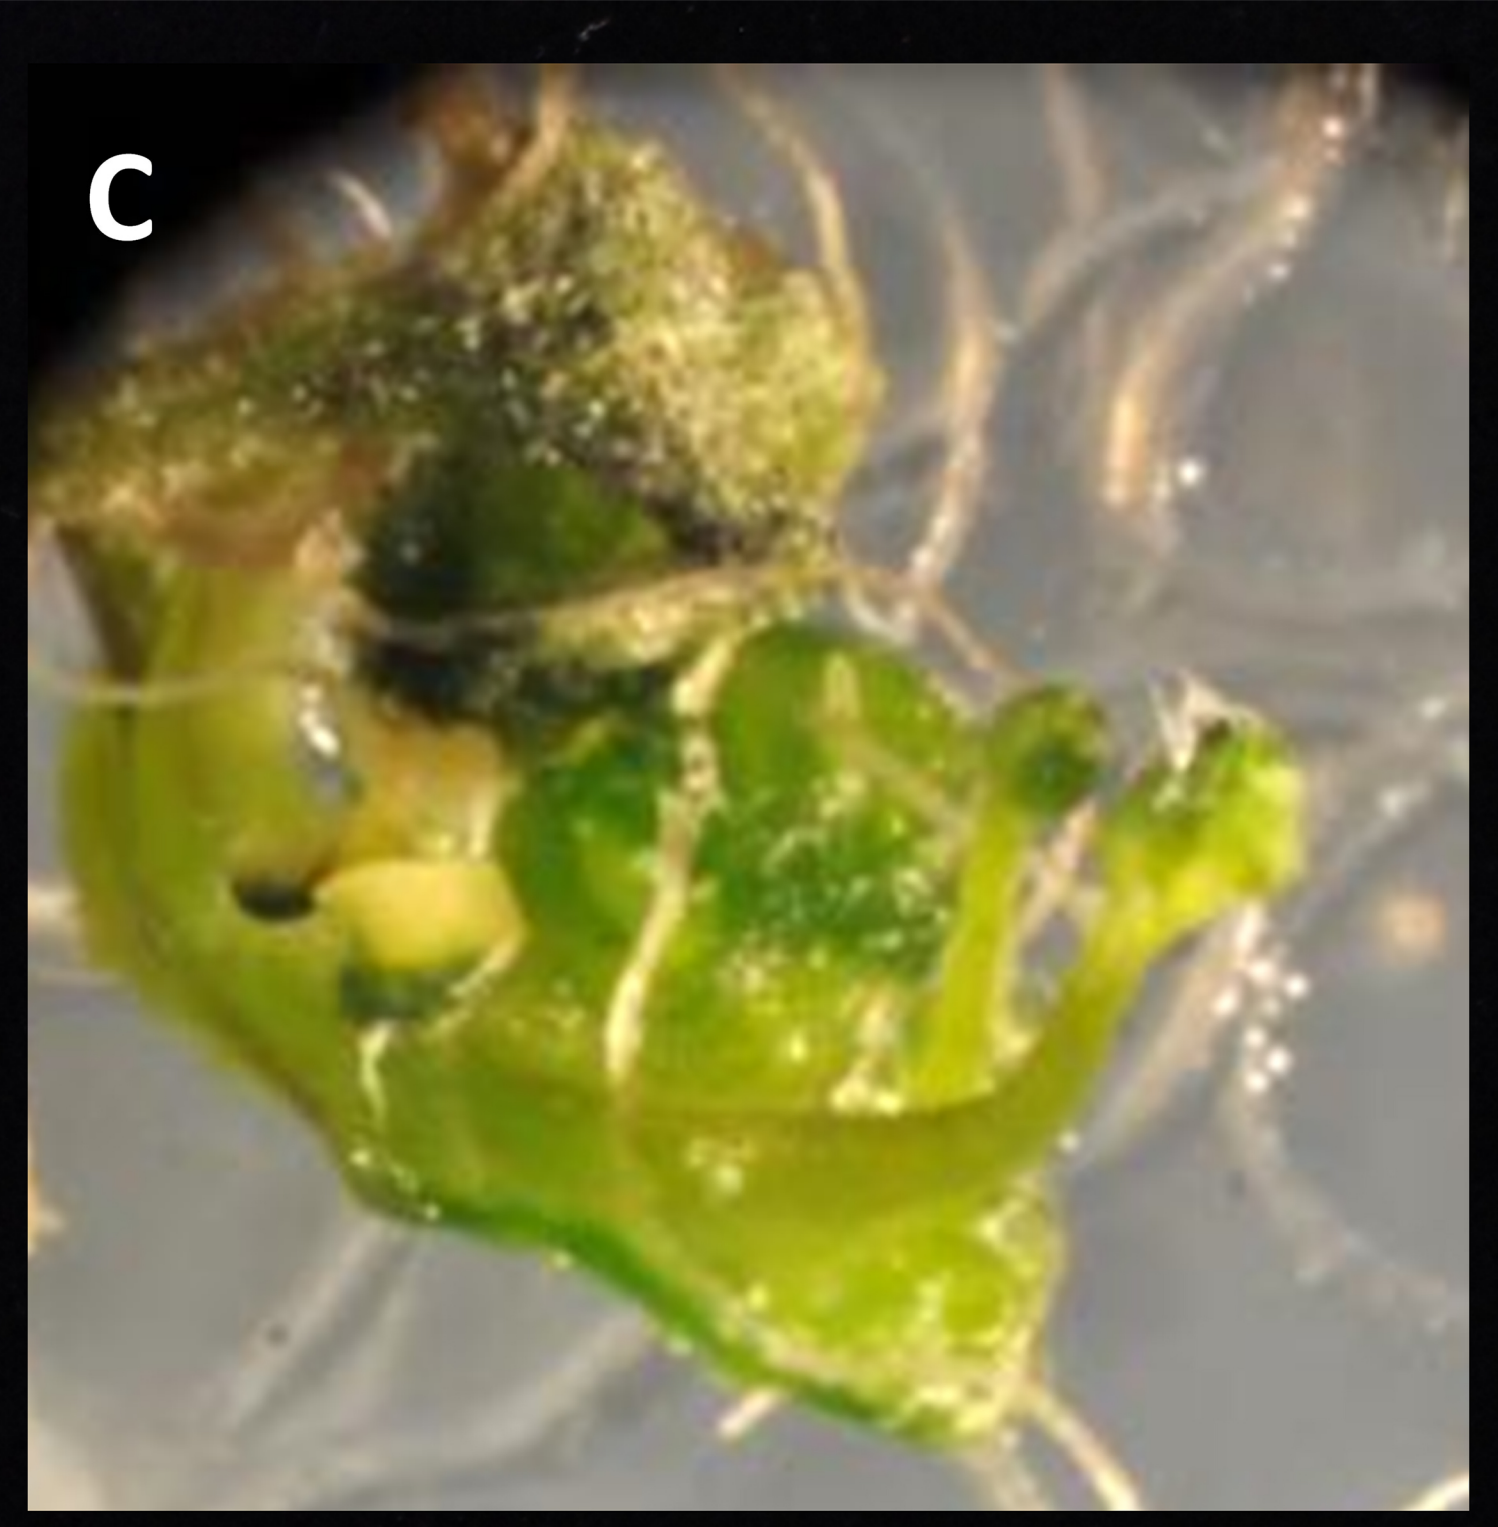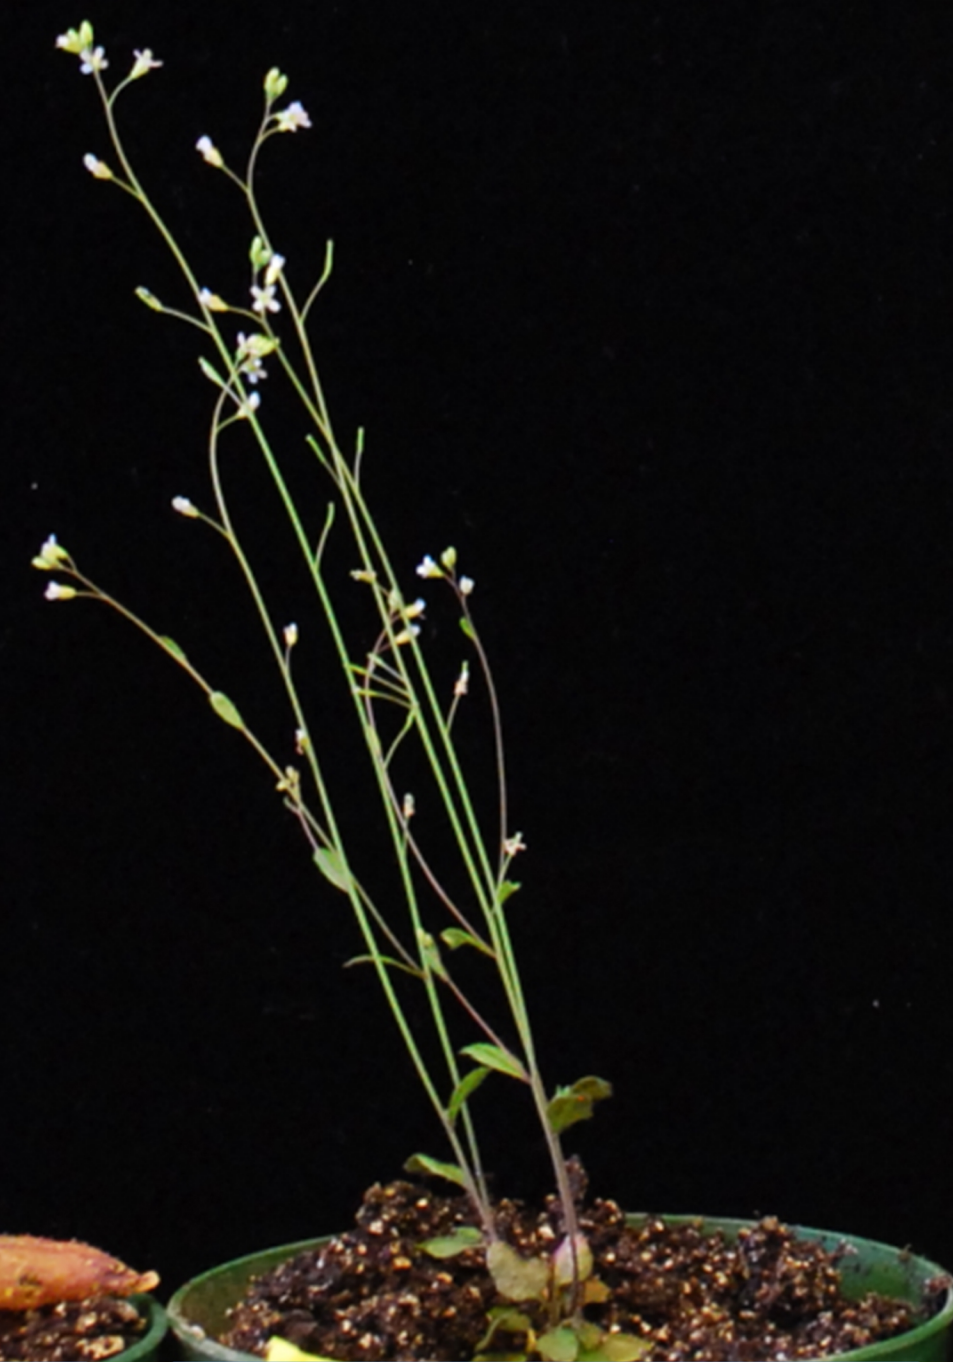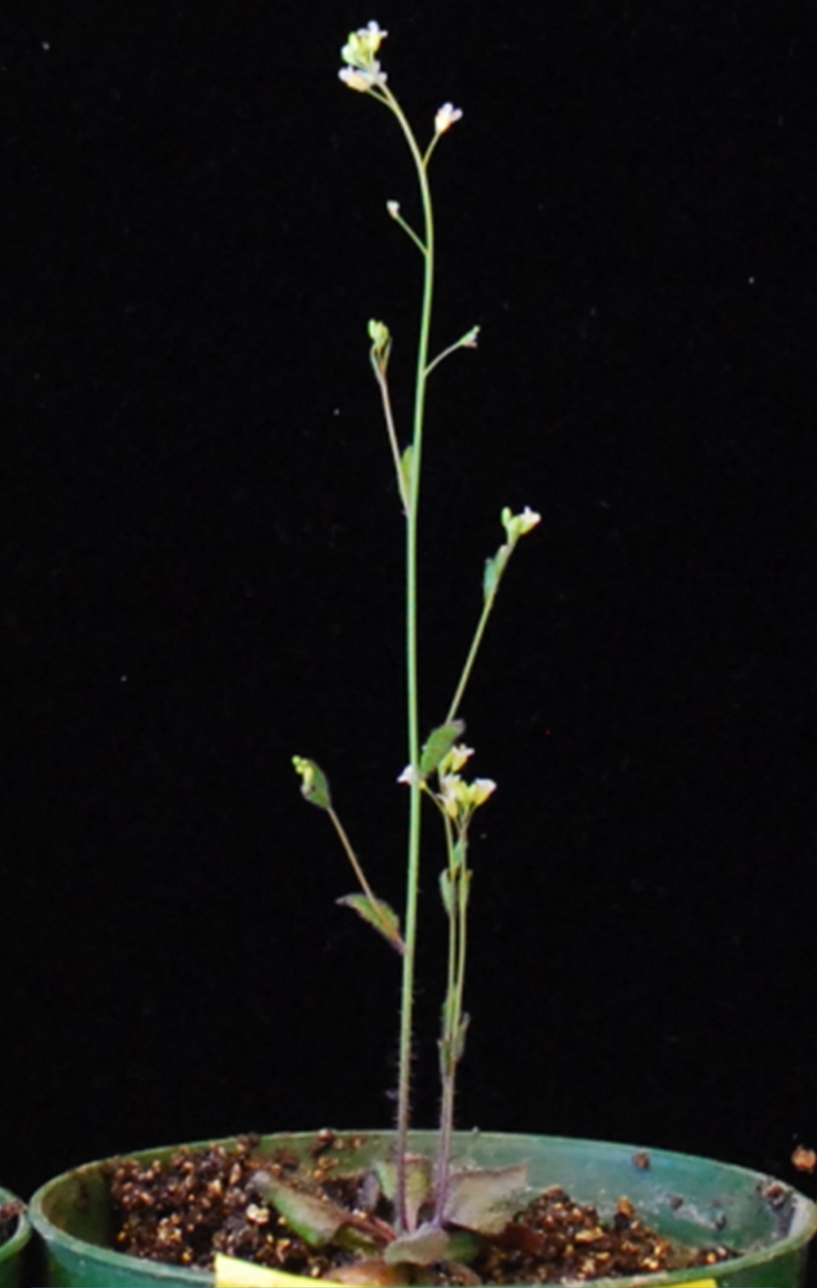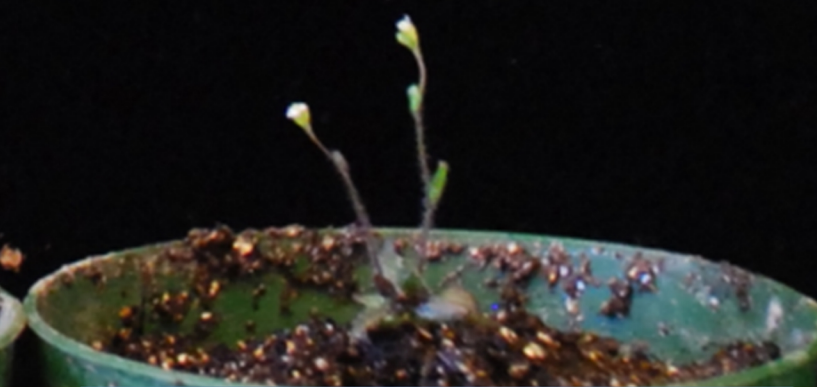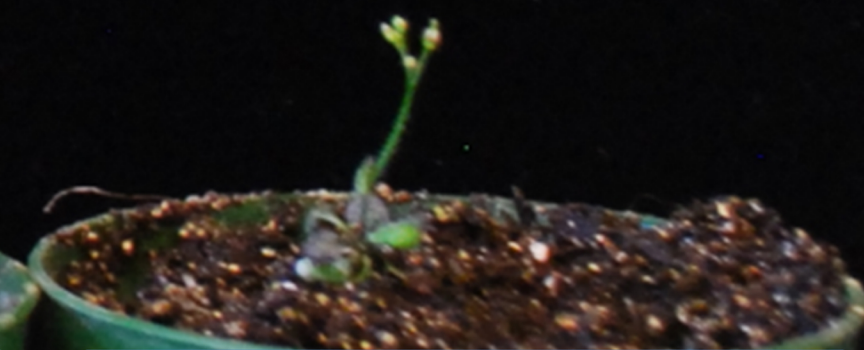**Col 0****Line CA****Line AB****Line AA****Line CB**
