# Supplementary material for: Enhanced somatic embryogenesis in Theobroma cacao using the homologous BABY BOOM transcription factor
Source: PubMed Central journal article supplement (PMC4449528; doi:10.1186/s12870-015-0479-4), 2015-05-16

# Empirical CDF

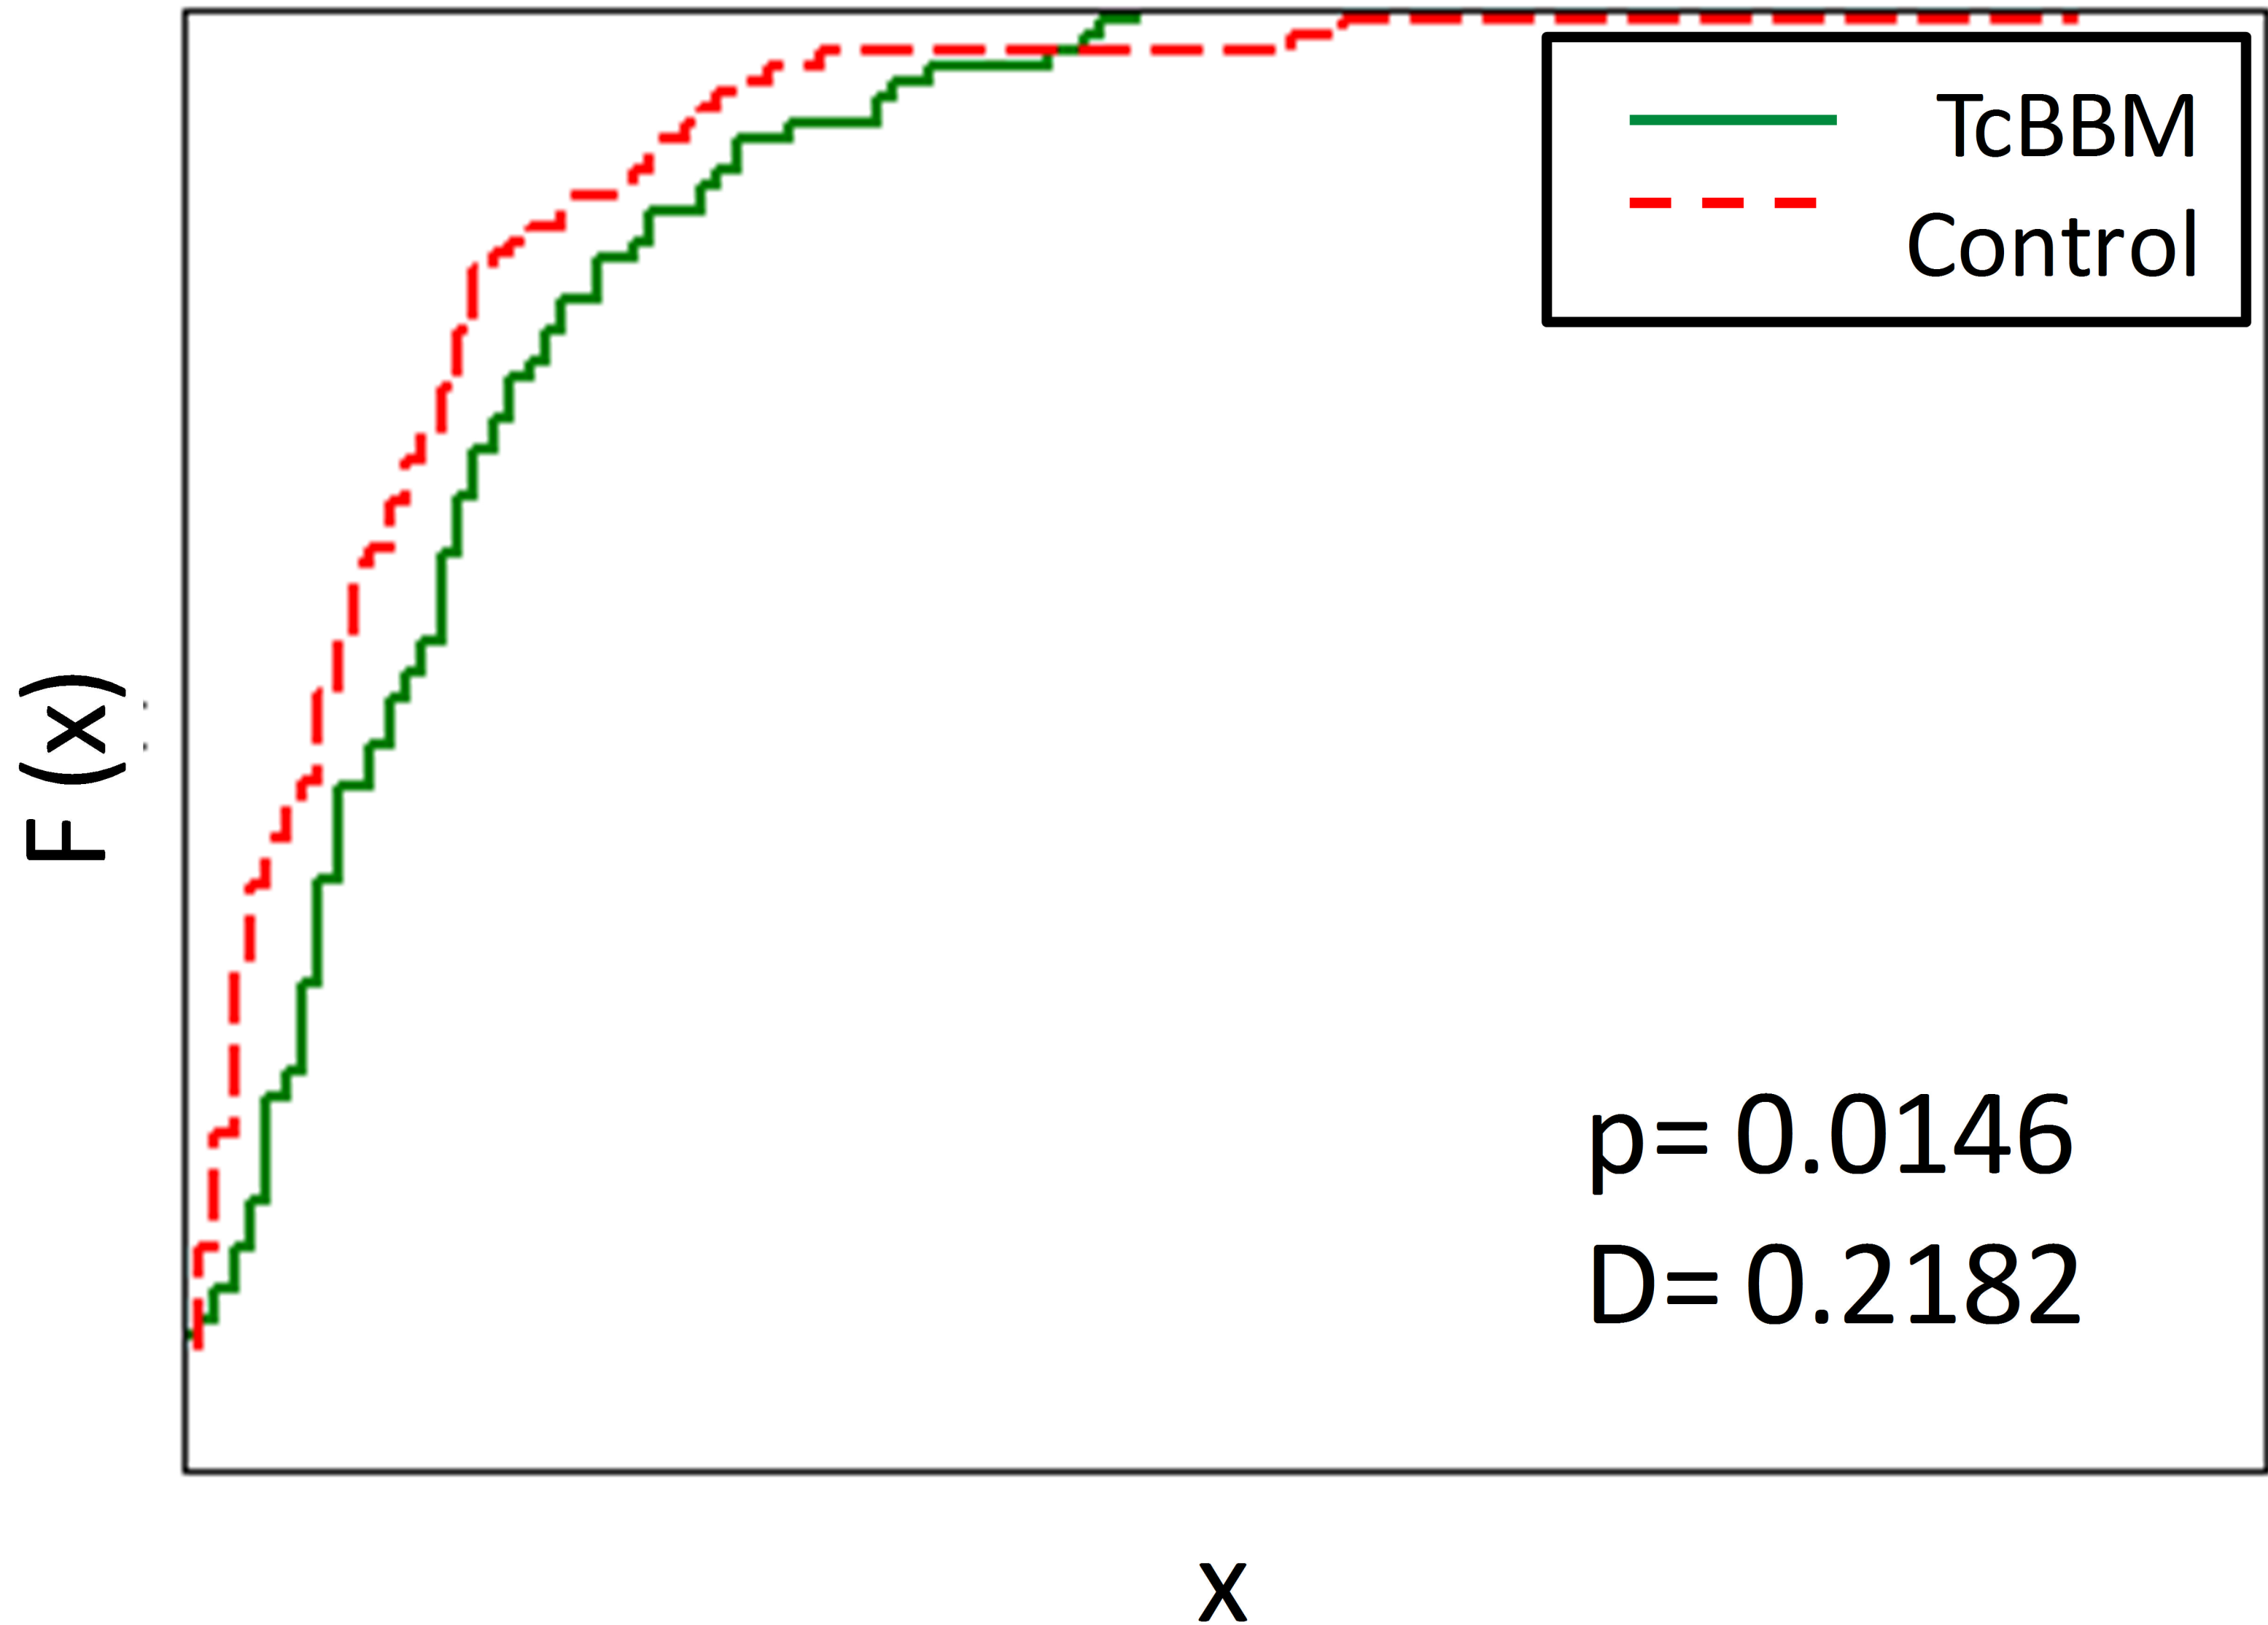

Supplement: 12870_2015_479_MOESM6_ESM.pdf [file 12870_2015_479_MOESM6_ESM.pdf]
